# Supplementary material for: RNA Modifications in Genomic RNA of Influenza A Virus and the Relationship between RNA Modifications and Viral Infection
Source: Int J Mol Sci. 2021 Aug 24;22(17):9127. doi: 10.3390/ijms22179127 (PMC8431438; doi:10.3390/ijms22179127)
Supplement: Supplementary file 1 [file ijms-22-09127-s001.zip › ijms-1345558-supplementary.pdf]

Supplementary material

| RNA modification | Manufacture | Catalogue number | Original concentration | Used volume in 200 µL reaction |
|------------------|-------------|------------------|------------------------|--------------------------------|
| Inosine          | MBL         | PM098            | Unknown                | 10 µL                          |
| m1A              | Abcam       | ab208196         | 0.66 µg/µL             | 20 µL                          |
| Pseudouridine    | diagenode   | c15200247        | 1.44 µg/µL             | 5 µL                           |
| ac4C             | Abcam       | ab252215         | 0.56 µg/µL             | 5 µL                           |
| m7G              | MBL         | RN017M           | 1 µg/µL                | 10 µL                          |

Supplementary table S1. List of antibodies used for RNA immunoprecipitation

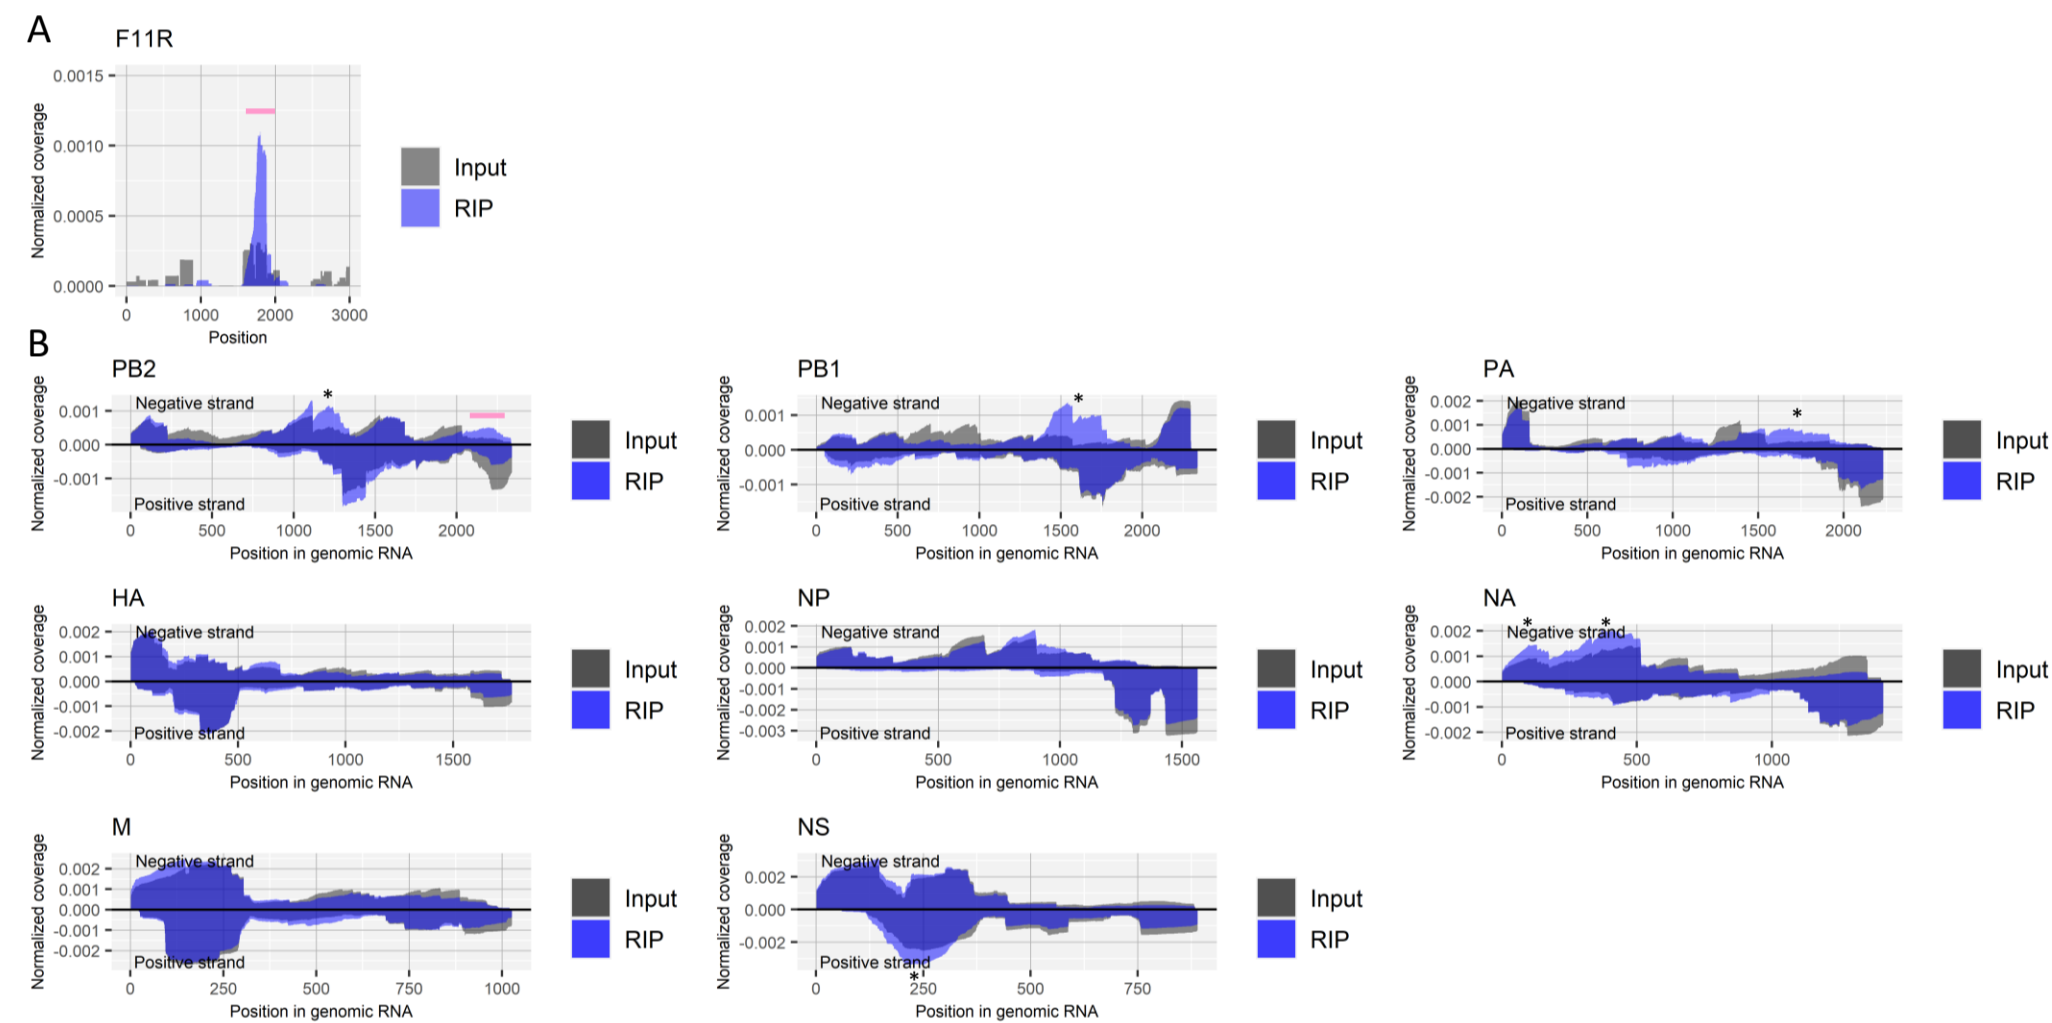

Supplementary figure S1. Detection of regions and sites with inosine in RNA derived from influenza A virus in biological replicate

Results of the biological replicate experiment of Figure 1.

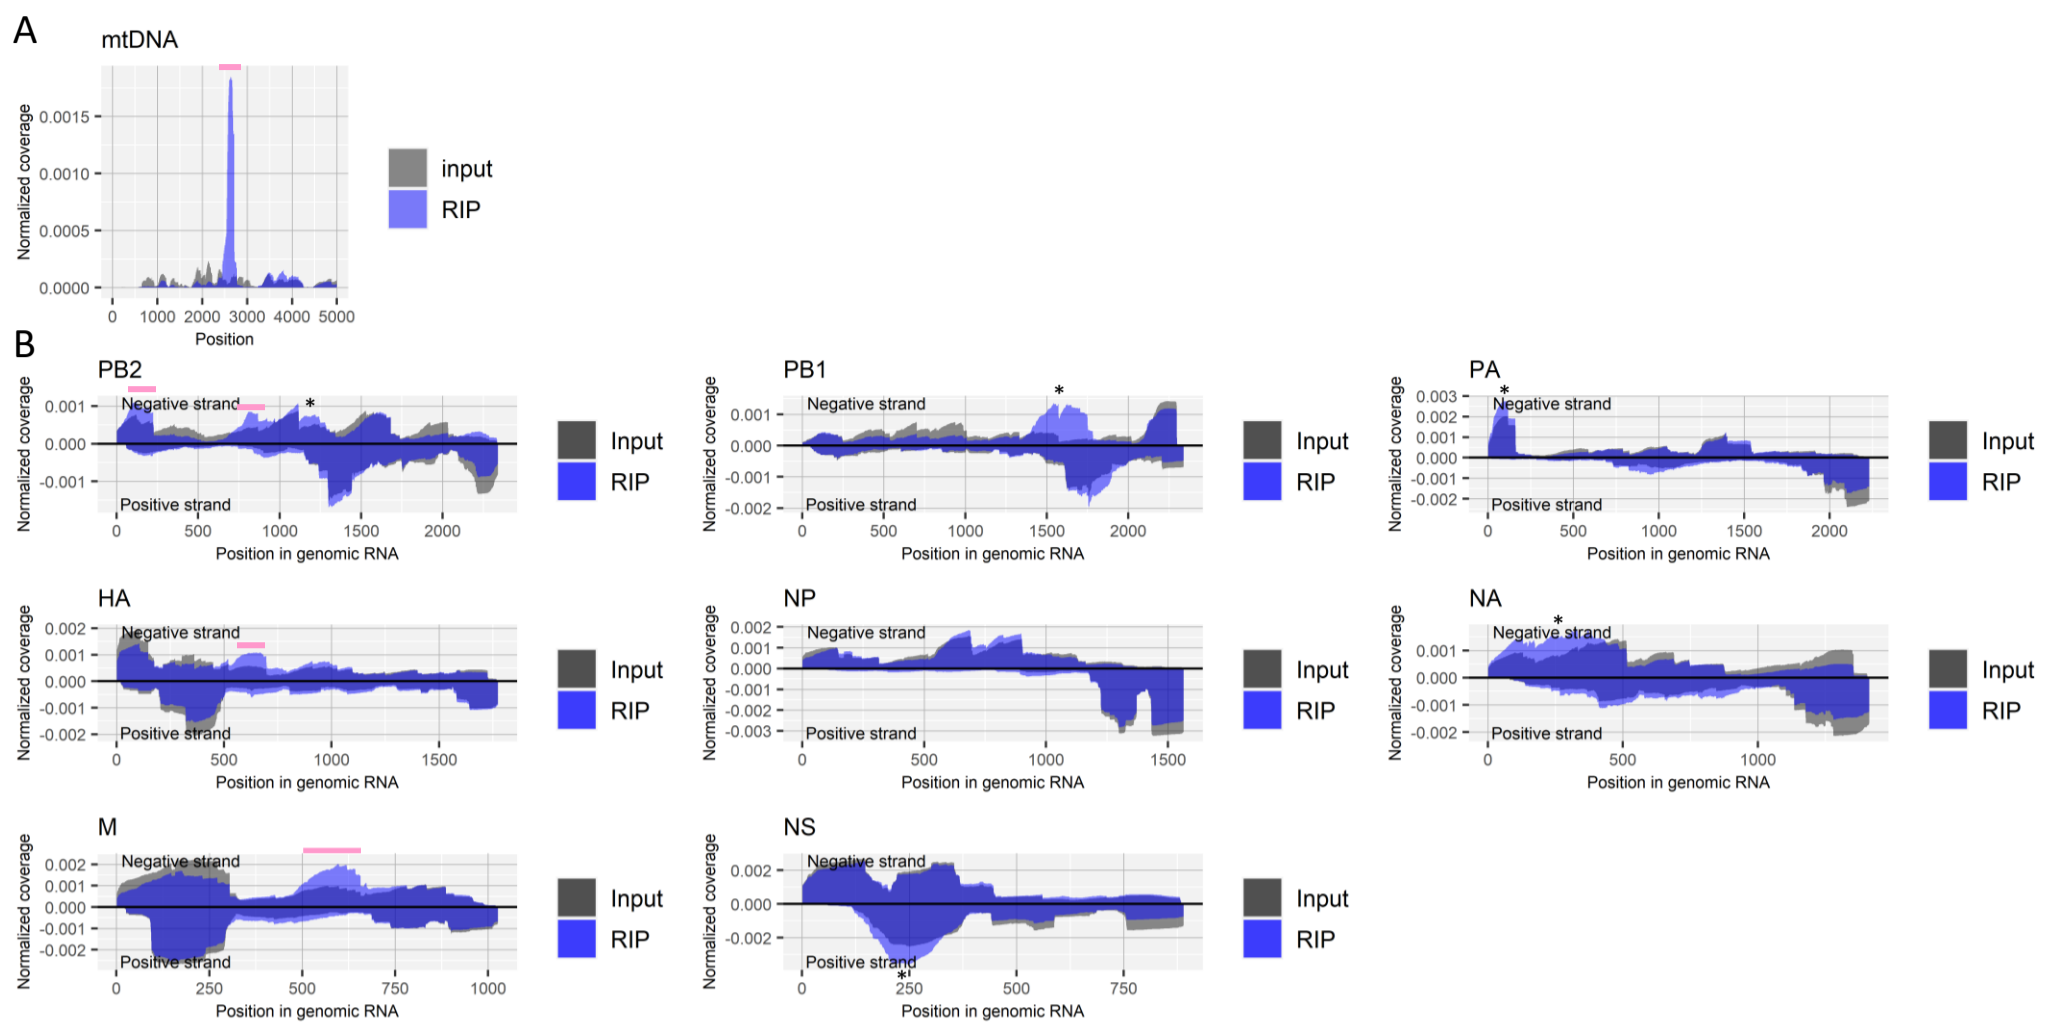

**Supplementary figure S2. Detection of regions that include m1A in RNA derived from influenza A virus in biological replicate**

Results of the biological replicate experiment of Figure 2.

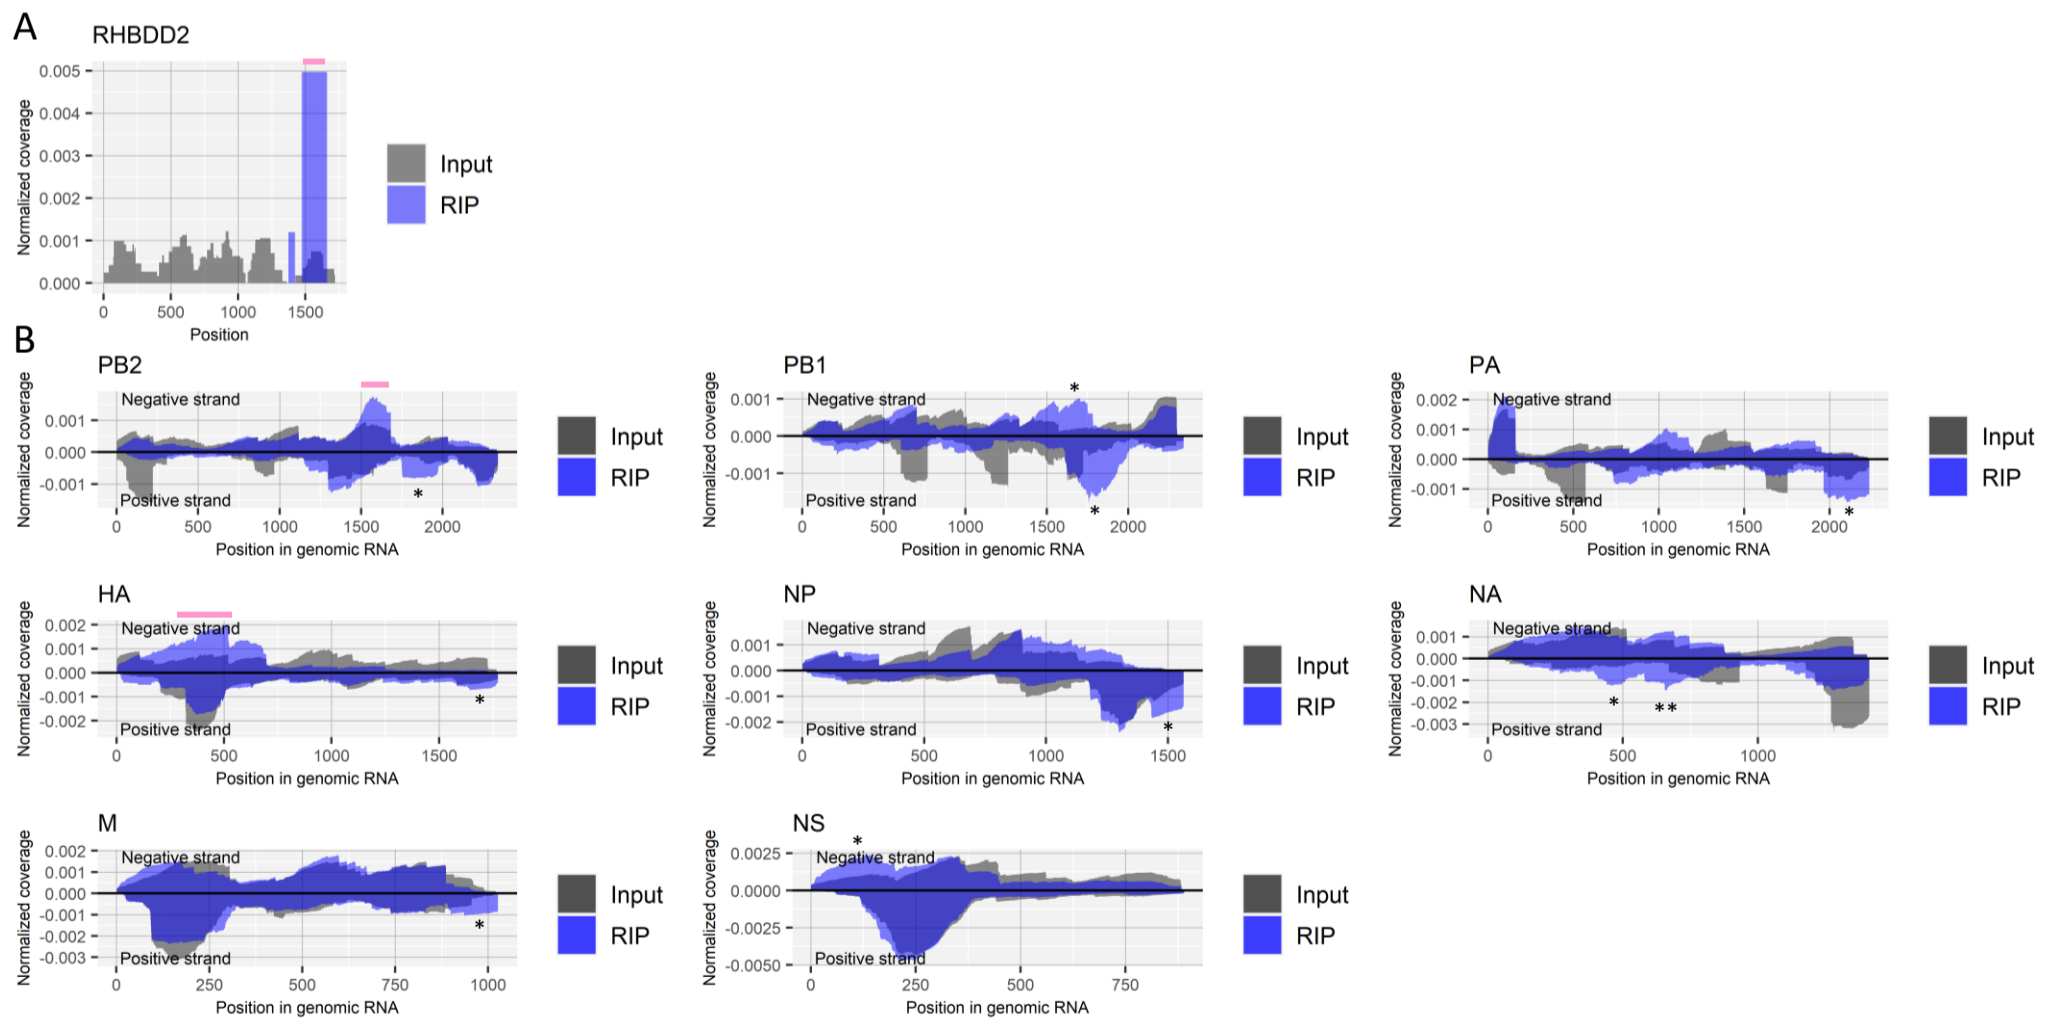

**Supplementary figure S3. Detection of regions that include pseudouridine in RNA derived from influenza A virus in biological replicate**

Results of the biological replicate experiment of Figure 3.

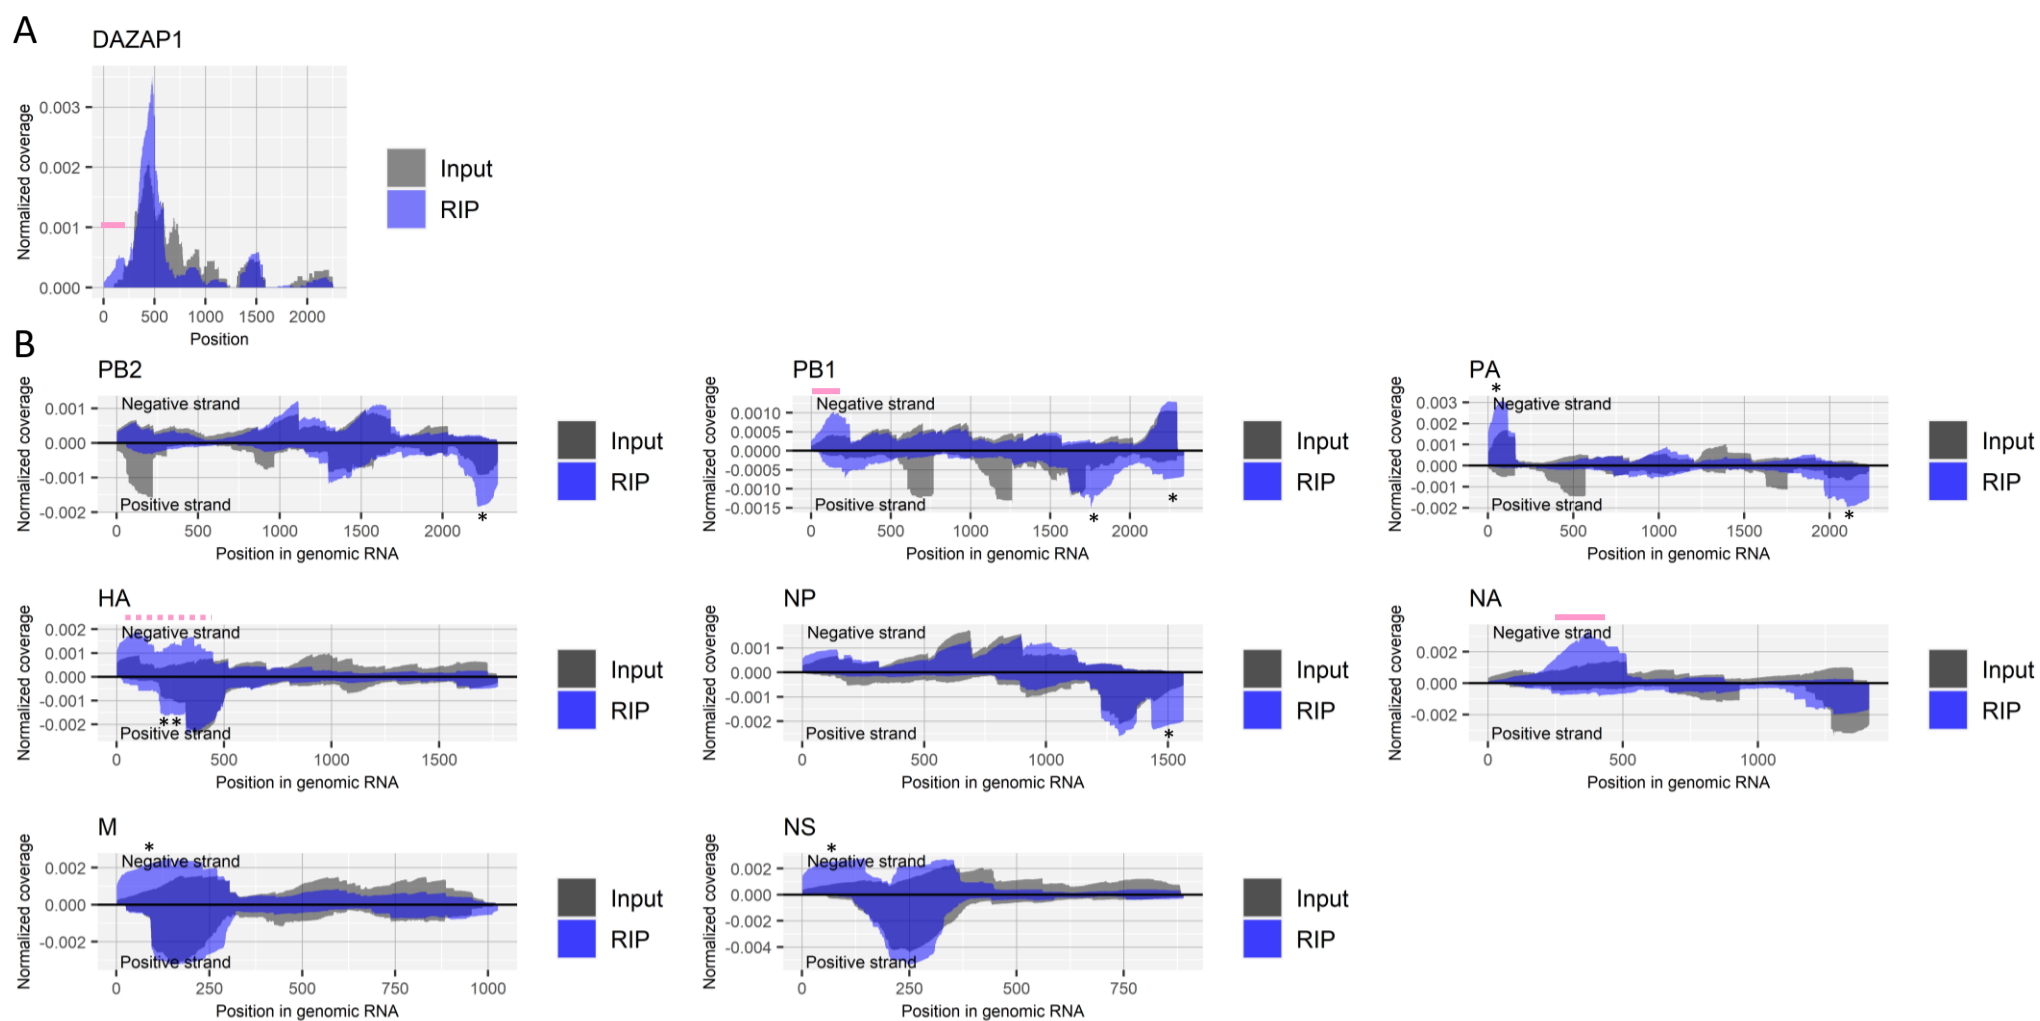

**Supplementary figure S4. Detection of regions that include ac4C in RNA derived from influenza A virus in biological replicate**

Results of the biological replicate experiment of Figure 4.

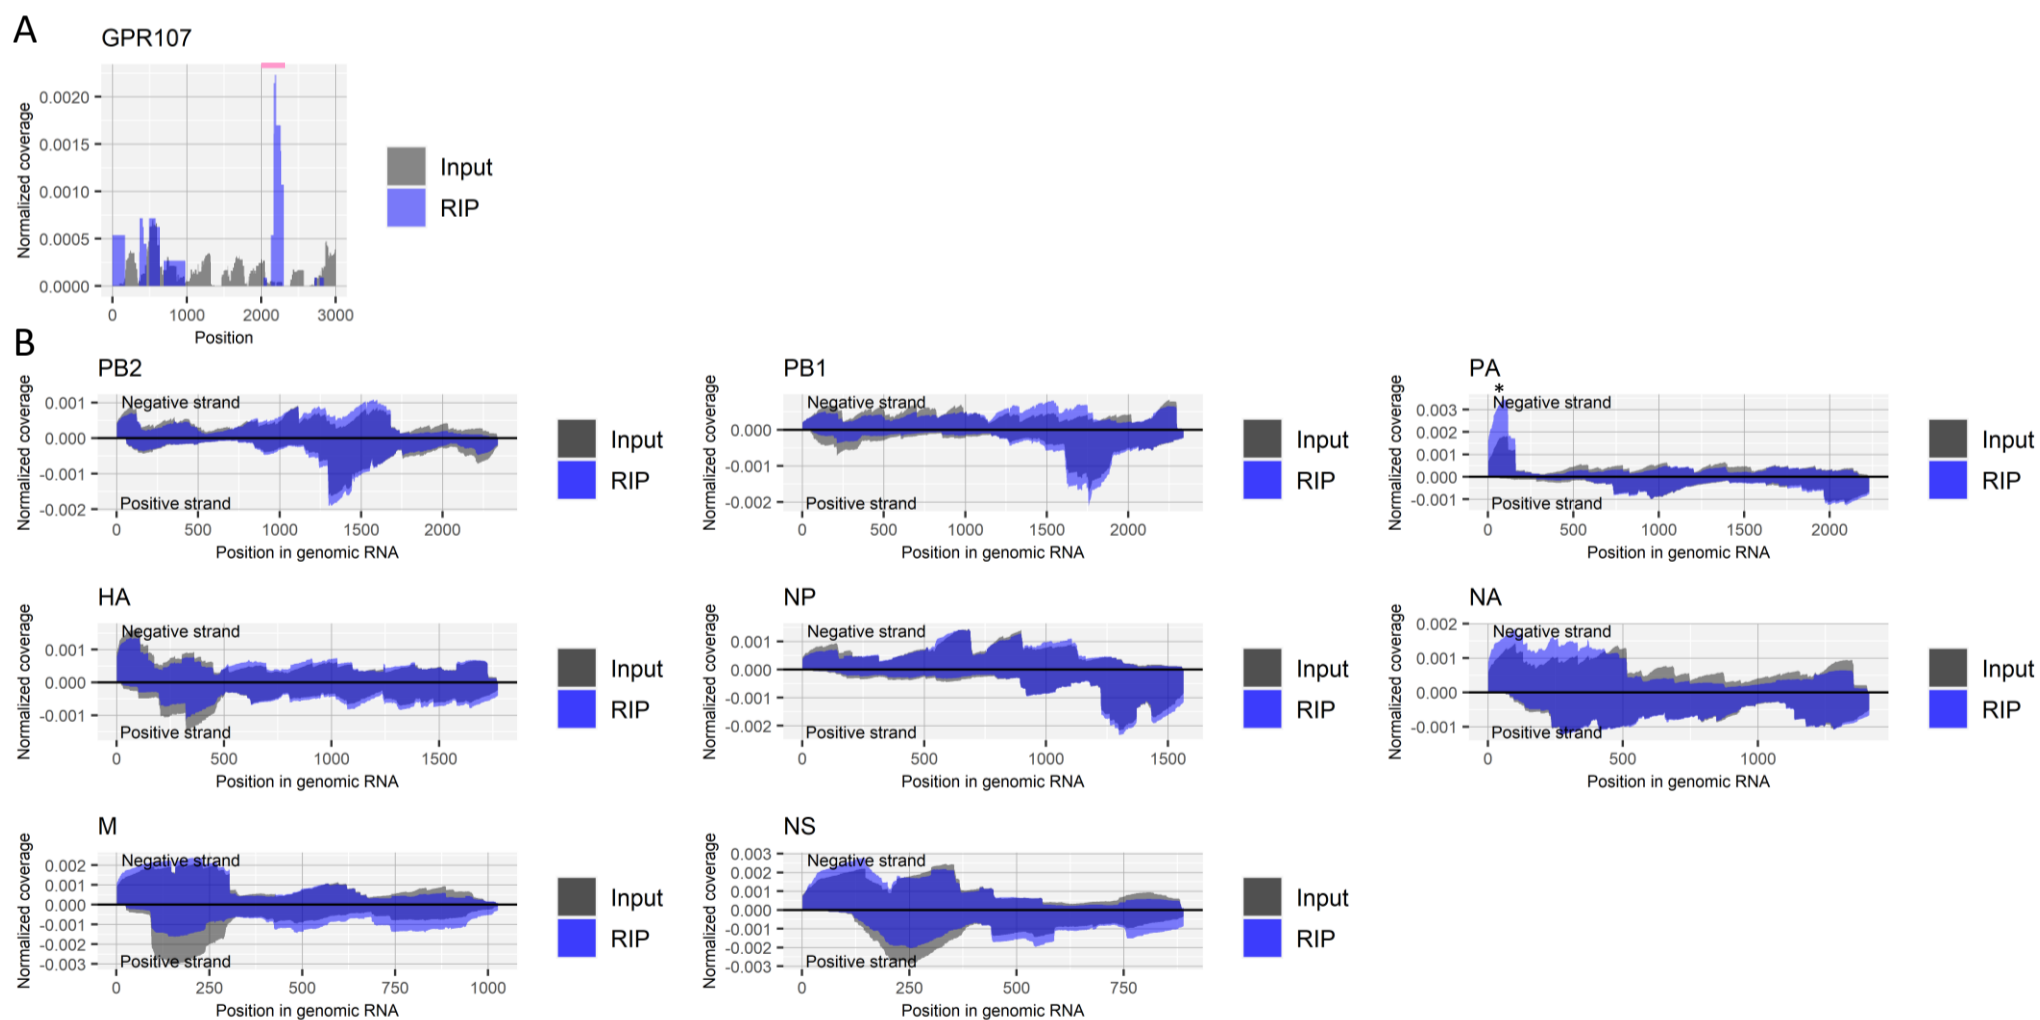

**Supplementary figure S5. Search for regions that include m7G in RNA derived from influenza A virus in biological replicate**

Results of the biological replicate experiment of Figure 5.
